# Supplementary material for: Association between Fibrinogen-to-Albumin Ratio and Prognosis of Hospitalized Patients with COVID-19: A Systematic Review and Meta-Analysis
Source: MDPI journal article supplement (doi:10.3390/diagnostics12071678), 2022-07-10
Supplement: s1 [file s1]

**Table S1.** Search strategies for Medline.

|   |                                                                                                                                                                                                  |
|---|--------------------------------------------------------------------------------------------------------------------------------------------------------------------------------------------------|
| 1 | ("severe acute respiratory syndrome" or "coronavirus 2" or "coronavirus" or "corona virus" or "covid-19" or "nCoV" or "2019nCoV" or "Wuhan virus" or "2019-nCoV" or "SARS-CoV-2 Infection*").mp. |
| 2 | exp "COVID 19"/ or exp "SARS-CoV-2"/                                                                                                                                                             |
| 3 | ("fibrinogen-to-albumin ratio" or "fibrinogen to albumin ratio").mp.                                                                                                                             |
| 4 | (1 or 2) and 3                                                                                                                                                                                   |
